# Supplementary material
Source: PubMed Central journal article supplement (PMC4750669)
Supplement: AAC.02242-15_zac001164791so1.pdf [file AAC.02242-15_zac001164791so1.pdf]

Supplemental information

Inhibition of *Pseudomonas aeruginosa* ExsA DNA-binding activity by *N*-hydroxybenzimidazoles

Marsden et. al

**Table S1. Bacterial strains and plasmids used in this study.**

| Bacterial strains                          | Relevant characteristics                                                | Reference             |                          |            |
|--------------------------------------------|-------------------------------------------------------------------------|-----------------------|--------------------------|------------|
| <i>Pseudomonas aeruginosa</i>              |                                                                         |                       |                          |            |
| PA103                                      | Wild-type parental strain                                               | (1)                   |                          |            |
| PA103 <i>exsA::Ω</i>                       | Chromosomal interposon insertion in <i>exsA</i>                         | (2)                   |                          |            |
| PA103 $\Delta$ <i>exsA</i>                 | In frame deletion of <i>exsA</i>                                        | (3)                   |                          |            |
| PA103 $\Delta$ <i>exoU</i> <i>exoT::Tc</i> | In frame deletion of <i>exoU</i> , Tc cassette insertion in <i>exoT</i> | (4)                   |                          |            |
| <i>Escherichia coli</i>                    |                                                                         |                       |                          |            |
| DH5 $\alpha$                               | <i>recA</i> cloning strain                                              | (5)                   |                          |            |
| BL21 (DE3) Tuner                           | Protein expression and purification                                     | Novagen               |                          |            |
| GS162                                      | Wild-type strain carrying $\Delta$ / <i>lacU169</i>                     | (6)                   |                          |            |
| Reporter fusions                           | Integration plasmid                                                     | Experiment            | Primer or primer pair    | Reference  |
| $P_{exsC-lacZ}$                            | mini-CTX- $P_{exsC-lacZ}$ (-186 to +17)                                 | Fig. S4A              | NA                       | (7)        |
| $P_{exoT-lacZ}$                            | mini-CTX- $P_{exoT-lacZ}$ (-179 to +17)                                 | Fig. S4B, C           | NA                       | (8)        |
| $P_{exoS-gfp}$                             | pJNE05                                                                  | Fig. 3, S2            | NA                       | (9)        |
| Expression plasmids                        | Relevant characteristics                                                | Experiment            | Primer or primer pair(s) | Reference  |
| pJN105                                     | Arabinose-inducible expression vector                                   | Fig. S4A-C            | NA                       | (10)       |
| pEB124                                     | Wild-type <i>exsA</i> expression vector                                 | Fig. S4A-C            | NA                       | (8)        |
| pET16b                                     | IPTG-inducible protein expression vector with an N-terminal His10 tag   |                       | NA                       | Novagen    |
| pET16b <i>exsA</i>                         | Source of purified ExsA <sub>His</sub>                                  | Fig. 2A-C; 5B; 7A; S5 | NA                       | (8)        |
| pET16b <i>lcrF</i>                         | Source of purified LcrF <sub>His</sub>                                  | Fig. 5C, 7C           | NA                       | (11)       |
| pET16b <i>ascA</i>                         | Source of purified AscA <sub>His</sub>                                  | Fig. 5D               | 124682246,124682249      | This study |
| pET16b <i>exsA</i> <sub>Vp</sub>           | Source of purified ExsA <sub>Vp-His</sub>                               | Fig. 5E               | 124682248,124682251      | This study |
| pET16b <i>exsA</i> -CTD                    | Source of purified ExsA-CTD <sub>His</sub>                              | Fig. 2D               | 124727245,117236112      | This study |
| pET16b <i>exsA</i> <sub>Vp</sub> -CTD      | Source of purified ExsA <sub>Vp</sub> -CTD <sub>His</sub>               | Fig. 6A               | 124727247,124682251      | This study |
| pET16b <i>vfr</i>                          | Source of purified Vfr <sub>His</sub>                                   | Fig. 6B               | NA                       | (12)       |

**Table S1. (continued) Bacterial strains and plasmids used in this study.**

| Expression plasmids | Relevant characteristics                      | Experiment  | Primer or primer pair(s)                     | Reference  |
|---------------------|-----------------------------------------------|-------------|----------------------------------------------|------------|
| pAM196              | Source of purified ExsA(S207T) <sub>His</sub> | Fig. 7B, S5 | 117236111,126035215;<br>117236112,126035214  | This study |
| pAM202              | Source of purified ExsA(M177E) <sub>His</sub> |             | 117236111,127030665;<br>117236112,127030664  | This study |
| pAM203              | Source of purified ExsA(H180E) <sub>His</sub> | Fig. S6A    | 117236111,127030667;<br>117236112,127030666  | This study |
| pAM204              | Source of purified ExsA(Y181E) <sub>His</sub> |             | 117236111,127030669;<br>117236112,127030668  | This study |
| pAM205              | Source of purified ExsA(N183E) <sub>His</sub> | Fig. S6B    | 117236111,127030671;<br>117236112, 127030670 | This study |
| pAM206              | Source of purified ExsA(W185E) <sub>His</sub> |             | 117236111,127030675;<br>117236112,127030674  | This study |
| pAM207              | Source of purified ExsA(I217E) <sub>His</sub> | Fig. S6C    | 117236111,126904065;<br>117236112,126904064  | This study |
| pAM208              | Source of purified ExsA(R221E) <sub>His</sub> |             | 117236111,126904067;<br>117236112,126904066  | This study |
| pAM209              | Source of purified ExsA(F245E) <sub>His</sub> |             | 117236111,126904069;<br>117236112,126904068  | This study |
| pAM210              | Source of purified ExsA(S247E) <sub>His</sub> |             | 117236111,126904071;<br>117236112,126904070  | This study |
| pAM211              | Source of purified ExsA(Y250E) <sub>His</sub> |             | 117236111,126904073;<br>117236112,126904072  | This study |
| pAM212              | Source of purified ExsA(E184A) <sub>His</sub> | Fig. S6D    | 117236111,126825499;<br>117236112,126825498  | This study |
| pAM213              | Source of purified ExsA(K186A) <sub>His</sub> | Fig. S6E    | 117236111,130973192;<br>117236112,130973191  | This study |
| pAM214              | Source of purified ExsA(P213A) <sub>His</sub> | Fig. S6F    | 117236111,130973194;<br>117236112,130973193  | This study |
| pAM215              | Source of purified ExsA(R214A) <sub>His</sub> | Fig. S6G    | 117236111,130973196;<br>117236112,130973195  | This study |
| pAM216              | Source of purified ExsA(M241A) <sub>His</sub> | Fig. S6H    | 117236111,130973198;<br>117236112,130973197  | This study |
| pAM217              | Source of purified ExsA(S246A) <sub>His</sub> | Fig. S6I    | 117236111,130973200;<br>117236112,130973199  | This study |

**Table S1. (continued) Bacterial strains and plasmids used in this study.**

| Expression plasmids | Relevant characteristics                      | Experiment | Primer or primer pair(s)                   | Reference  |
|---------------------|-----------------------------------------------|------------|--------------------------------------------|------------|
| pAM231              | Source of purified LcrF(T203S) <sub>His</sub> | Fig. 7D    | 132425570,132342334<br>124818301,132342333 | This study |

**Table S2. Primers used in this study.**

| Primer ID | Name                 | Primer Sequence                                                           |
|-----------|----------------------|---------------------------------------------------------------------------|
| 22963127  | Pc5'Hind             | 5'-ACGCAAGCTTATGAAGGACGTCCTGCAGCTCATCC                                    |
| 49188917  | Pc3'EcoRI            | 5'-TGATGAATTCGCCTCCTAAAGCTCAGCGCATGC                                      |
| 85333731  | algD5_nonsp          | 5'-CAGGGGTGTTCGGAGGGACGAACGGTA                                            |
| 85333730  | algD3_nonsp          | 5'-ACGGCTATTACTTCAGCGCCGAGCAATC                                           |
| 124727245 | exsA CTD Gibson      | 5'-TATCGAAGGTCGTCATATGGAGAATCTTTATTTTCAGGGCAACCGGCATGTTCGAG<br>CGTCTGCAGC |
| 117236111 | exsA Gibson pET16b 1 | 5'-CATATCGAAGGTCGTCATATGCAAGGAGCCAAATCTC                                  |
| 117236112 | exsA Gibson pET16b 2 | 5'-GCTTTGTTAGCAGCCGATCCTCAGTTATTTTTCAGCCCGG                               |
| 124727249 | ascA Gibson          | 5'-TATCGAAGGTCGTCATATGGAGAATCTTTATTTTCAGGGCAACCGCCAGGTTGAA<br>CGATTACAGC  |
| 124682249 | AxsA3'BampET16b      | 5'-GCTTTGTTAGCAGCCGATCCTTAATCTTTGCCATGTCTGGC                              |
| 124727247 | vxsA CTD Gibson      | 5'-TATCGAAGGTCGTCATATGGAGAATCTTTATTTTCAGGGCAACCGAACCTCAGAC<br>CGTTACGCC   |
| 124682251 | VxsA3'BampET16b      | 5'-GCTTTGTTAGCAGCCGATCCTCAATTAGCGATGGCGACTTG                              |
| 124727246 | lcrF CTD Gibson      | 5'-TATCGAAGGTCGTCATATGGAGAATCTTTATTTTCAGGGCAACCGCCAGGAAGA<br>ACGGTTGCAAA  |
| 124818301 | LcrF3'pET16b Gibson  | 5'-GCTTTGTTAGCAGCCGTTAGCCTGTGGTTGCTATTTTTCAG                              |
| 124682246 | AxsA5'NdepET16b      | 5'-CATATCGAAGGTCGTCATATGAAAGGCATTACAACCA                                  |
| 124682248 | VxsA5'NdepET16b      | 5'-CATATCGAAGGTCGTCATATGGATGTGTCAGGCCAAC                                  |
| 126035214 | ExsAS207TGibsonfor   | 5'-AAGGAGCTGTTTCGGCACCGTCTACGGGGTTTCG                                     |
| 126035215 | ExsAS207TGibsonrev   | 5'-CGAAACCCCGTAGACGGTGCCGAACAGCTCCTT                                      |
| 127030664 | ExsAM177EGibsonfor   | 5'-CTGCAGCTATTCGAGGAGAAGCACTAC                                            |
| 127030665 | ExsAM177EGibsonrev   | 5'-GTAGTGCTTCTCCTCGAATAGCTGCAG                                            |
| 127030666 | ExsAH180EGibsonfor   | 5'-TTCATGGAGAAGGAGTACCTCAACGAG                                            |
| 127030667 | ExsAH180EGibsonrev   | 5'-CTCGTTGAGGTAATCCTTCTCCATGAA                                            |
| 127030668 | ExsAY181EGibsonfor   | 5'-ATGGAGAAGCACGAGCTCAACGAGTGG                                            |
| 127030669 | ExsAY181EGibsonrev   | 5'-CCACTCGTTGAGCTCGTGCTTCTCCAT                                            |
| 127030670 | ExsAN183EGibsonfor   | 5'-AAGCACTACCTCGAGGAGTGGAAGCTG                                            |
| 127030671 | ExsAN183EGibsonrev   | 5'-CAGCTTCCACTCCTCGAGGTAGTGCTT                                            |
| 127030674 | ExsAW185EGibsonfor   | 5'-TACCTCAACGAGGAGAAGCTGTCCGAC                                            |
| 127030675 | ExsAW185EGibsonrev   | 5'-GTCGGACAGCTTCTCCTCGGTGAGGTA                                            |
| 126904064 | ExsAI217EGibsonfor   | 5'-CCGCGCGCCTGGGAGAGCGAGCGGAGA                                            |
| 126904065 | ExsAI217EGibsonrev   | 5'-TCTCCGCTCGCTCTCCAGGCGCGCGG                                             |
| 126904066 | ExsAR221EGibsonfor   | 5'-ATCAGCGAGCGGGAGATCCTCTATGCC                                            |

**Table S2. (continued) Primers used in this study.**

| Primer ID | Name               | Primer Sequence                            |
|-----------|--------------------|--------------------------------------------|
| 126904067 | ExsAR221EGibsonrev | 5'-GGCATAGAGGATCTCCCGCTCGCTGAT             |
| 126904068 | ExsAF245EGibsonfor | 5'-ATGGAGGCGGGCGAGTCCAGCCAGTCC             |
| 126904069 | ExsAF245EGibsonrev | 5'-GGACTGGCTGGACTCGCCCGCCTCCAT             |
| 126904070 | ExsAS247EGibsonfor | 5'-GCGGGCTTTTCCGAGCAGTCCTATTTT             |
| 126904071 | ExsAS247EGibsonrev | 5'-GAAATAGGACTGCTCGGAAAAGCCCGC             |
| 126904072 | ExsAY250EGibsonfor | 5'-TCCAGCCAGTCCGAGTTCACCCAGAG              |
| 126904073 | ExsAY250EGibsonrev | 5'-CTCTGGGTGAACTCGGACTGGCTGGA              |
| 33075941  | 2UY27A             | 5'-TATGAATCCCATGCCGAACCGGTAGCC             |
| 33075940  | 2UY27B             | 5'-GGGGGCAGGTAGGGGATCCGCTCGGCAATCGG        |
| 126825498 | ExsAE184AGibsonfor | 5'-CACTACCTCAACGCCTGGAAGCTGTCC             |
| 126825499 | ExsAE184AGibsonrev | 5'-GGACAGCTTCCAGGCGTTGAGGTAGTG             |
| 130973191 | ExsAK186AGibsonfor | 5'-CTCAACGAGTGGGCCCTGTCCGACTTC             |
| 130973192 | ExsAK186AGibsonrev | 5'-GAAGTCGAACAGGGCCCACTCGTTGAG             |
| 130973193 | ExsAP213AGibsonfor | 5'-TACGGGGTTTTCGGCCCGCGCCTGGATC            |
| 130973194 | ExsAP213AGibsonrev | 5'-GATCCAGCCGCGGGCCGAAACCCCGTA             |
| 130973195 | ExsAR214AGibsonfor | 5'-GGGGTTTTCGCCGGCCGCCTGGATCAGC            |
| 130973196 | ExsAR214AGibsonrev | 5'-GCTGATCCAGGCGGCCGCGAAACCCC              |
| 130973197 | ExsAM241AGibsonfor | 5'-GTCGACATCGCCGCCGAGGCGGGCTTT             |
| 130973198 | ExsAM241AGibsonrev | 5'-AAAGCCCGCCTCGGCGGCGATGTCGAC             |
| 130973199 | ExsAS246AGibsonfor | 5'-GAGGCGGGCTTTGCCAGCCAGTCCTAT             |
| 130973200 | ExsAS246AGibsonrev | 5'-ATAGGACTGGCTGGCAAAGCCCGCCTC             |
| 132342333 | LcrF T203S for     | 5'-GAACTGTTTGGTAGCGTTTATGGCATT             |
| 132342334 | LcrF T203S rev     | 5'-AATGCCATAAACGCTACCAAACAGTTC             |
| 132425570 | LcrF5'pET16bGibson | 5'-CATATCGAAGGTCGTCATATGGCATCACTAGAGATTATT |

## REFERENCES

1. **Liu PV.** 1966. The roles of various fractions of *Pseudomonas aeruginosa* in its pathogenesis. 3. Identity of the lethal toxins produced in vitro and in vivo. *J. Infect. Dis.* **116**:481-489.
2. **Frank DW, Nair G, Schweizer HP.** 1994. Construction and characterization of chromosomal insertional mutations of the *Pseudomonas aeruginosa* exoenzyme S trans-regulatory locus. *Infect. Immun.* **62**:554-563.
3. **Brutinel ED, Vakulskas CA, Yahr TL.** 2010. ExsD inhibits expression of the *Pseudomonas aeruginosa* type III secretion system by disrupting ExsA self-association and DNA binding activity. *J. Bacteriol.* **192**:1479-1486.
4. **Yahr TL, Vallis AJ, Hancock MK, Barbieri JT, Frank DW.** 1998. ExoY, an adenylate cyclase secreted by the *Pseudomonas aeruginosa* type III system. *Proc. Natl. Acad. Sci. U. S. A.* **95**:13899-13904.
5. **Hanahan D.** 1983. Studies on transformation of *Escherichia coli* with plasmids. *J. Mol. Biol.* **166**:557-580.
6. **Stauffer GV, Plamann MD, Stauffer LT.** 1981. Construction and expression of hybrid plasmids containing the *Escherichia coli* glyA genes. *Gene* **14**:63-72.
7. **McCaw ML, Lykken GL, Singh PK, Yahr TL.** 2002. ExsD is a negative regulator of the *Pseudomonas aeruginosa* type III secretion regulon. *Mol. Microbiol.* **46**:1123-1133.
8. **Brutinel ED, Vakulskas CA, Brady KM, Yahr TL.** 2008. Characterization of ExsA and of ExsA-dependent promoters required for expression of the *Pseudomonas aeruginosa* type III secretion system. *Mol. Microbiol.* **68**:657-671.
9. **Urbanowski ML, Brutinel ED, Yahr TL.** 2007. Translocation of ExsE into Chinese hamster ovary cells is required for transcriptional induction of the *Pseudomonas aeruginosa* type III secretion system. *Infect. Immun.* **75**:4432-4439.
10. **Newman JR, Fuqua C.** 1999. Broad-host-range expression vectors that carry the L-arabinose-inducible *Escherichia coli* araBAD promoter and the araC regulator. *Gene* **227**:197-203.
11. **King JM, Schesser Bartra S, Plano G, Yahr TL.** 2013. ExsA and LcrF recognize similar consensus binding sites, but differences in their oligomeric state influence interactions with promoter DNA. *J. Bacteriol.* **195**:5639-5650.
12. **Fuchs EL, Brutinel ED, Klem ER, Fehr AR, Yahr TL, Wolfgang MC.** 2010. In vitro and in vivo characterization of the *Pseudomonas aeruginosa* cyclic AMP (cAMP) phosphodiesterase CpdA, required for cAMP homeostasis and virulence factor regulation. *J. Bacteriol.* **192**:2779-2790.

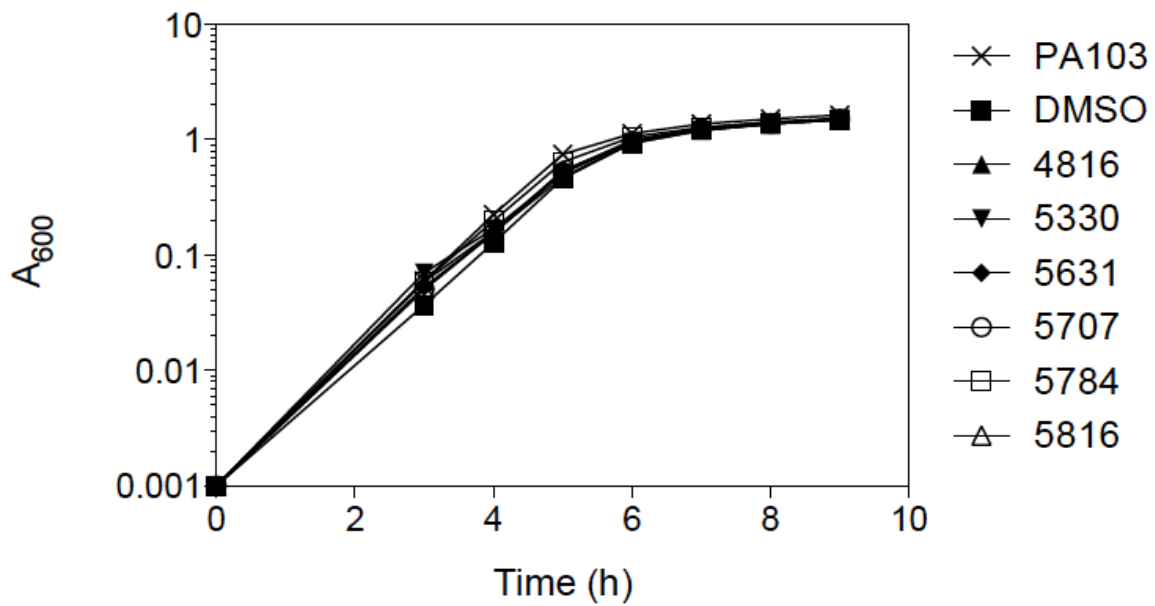

FIG S1. Growth curve for PA103 in the presence of *N*-hydroxybenzimidazoles. Wild-type *P. aeruginosa* (PA103) was grown overnight on VBM agar then suspended at an  $A_{600}$  of 0.001 with each *N*-hydroxybenzimidazole (125  $\mu$ M) or DMSO (2.5%) and grown at 37°C with shaking.

Figure S1



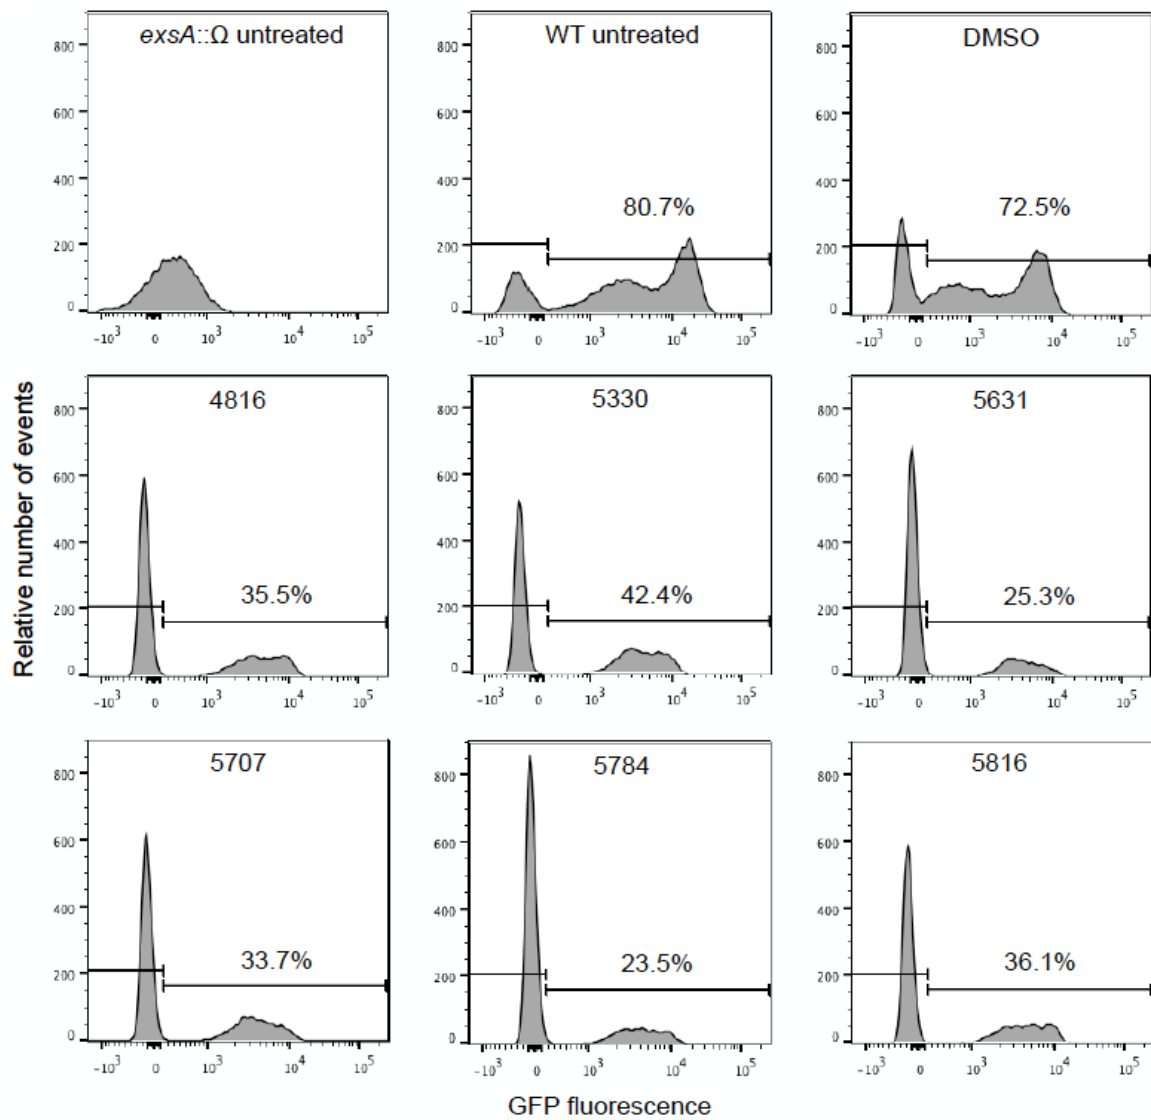

FIG S2. *N*-hydroxybenzimidazoles inhibit ExsA-dependent gene expression. Representative data from an *exoU*, *exoT* mutant carrying a GFP transcriptional reporter (PA103  $\Delta$ *exoU* *exoT*::Tc P<sub>*exoS*</sub>-*gfp*) incubated with DMSO (2.5%) or the indicated *N*-hydroxybenzimidazole (125  $\mu$ M) for 15 min prior to incubation with CHO cells for 4 hr at 37°C. Reporter activity was measured by flow cytometry.

Figure S2

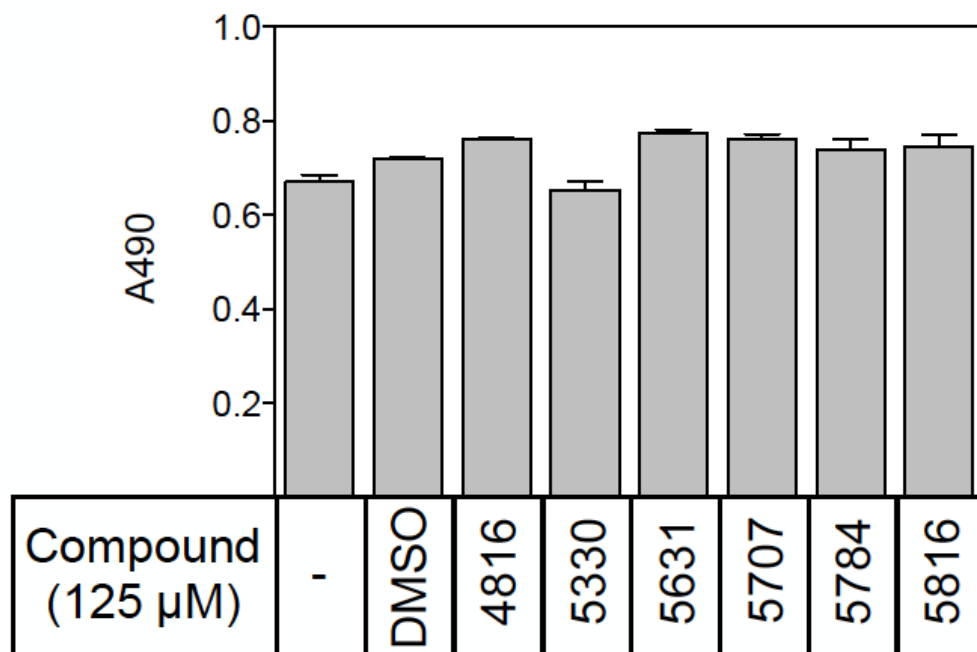

FIG S3. *N*-hydroxybenzimidazoles do not inhibit purified lactate dehydrogenase activity. Purified LDH enzyme was incubated with DMSO (2.5%) or the indicated *N*-hydroxybenzimidazole (125 μM) for 15 min at 25°C and activity was assayed.

Figure S3

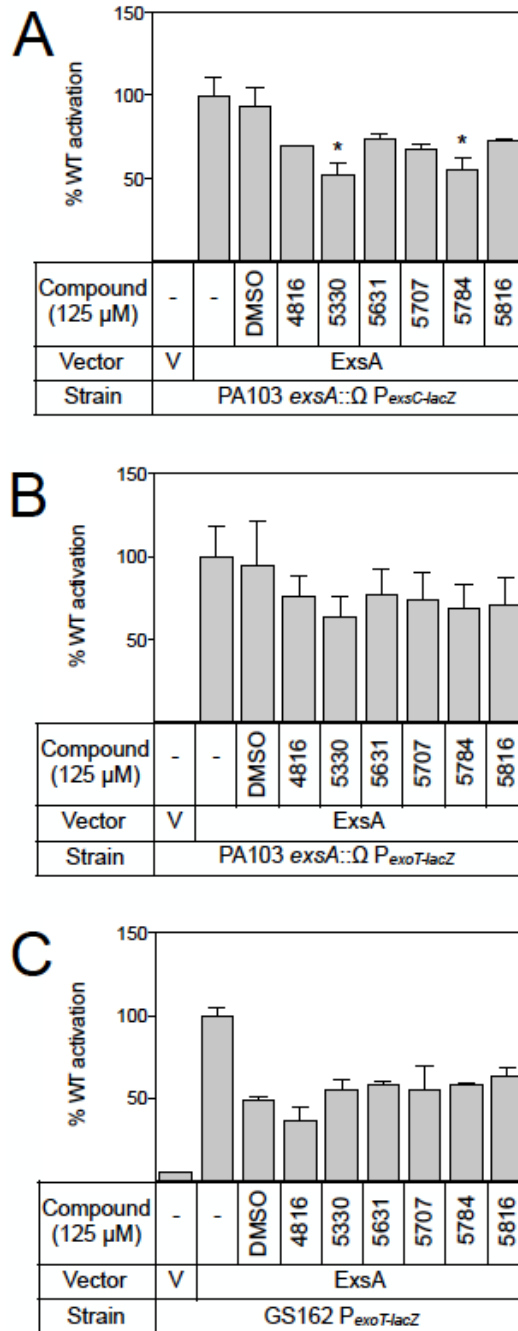

FIG S4. *N*-hydroxybenzimidazoles do not significantly inhibit ExsA-dependent promoter activity in broth cultures. (A-B) *P. aeruginosa exsA* mutants or (C) *E. coli* GS162 carrying  $P_{exsC-lacZ}$  (A) or  $P_{exoT-lacZ}$  (B and C) transcriptional reporters and either a vector control (V) or an arabinose-inducible *exsA* expression vector (ExsA) were grown with 0.1% arabinose to an  $A_{600}$  of 1.0 in the presence of each *N*-hydroxybenzimidazole (125  $\mu$ M) at 30°C.  $\beta$ -galactosidase activity was assayed and expressed as a percentage of the activity measured in untreated samples expressing *exsA*. Statistical differences were determined by comparison to DMSO treatment. \*,  $P < 0.01$ .

Figure S4

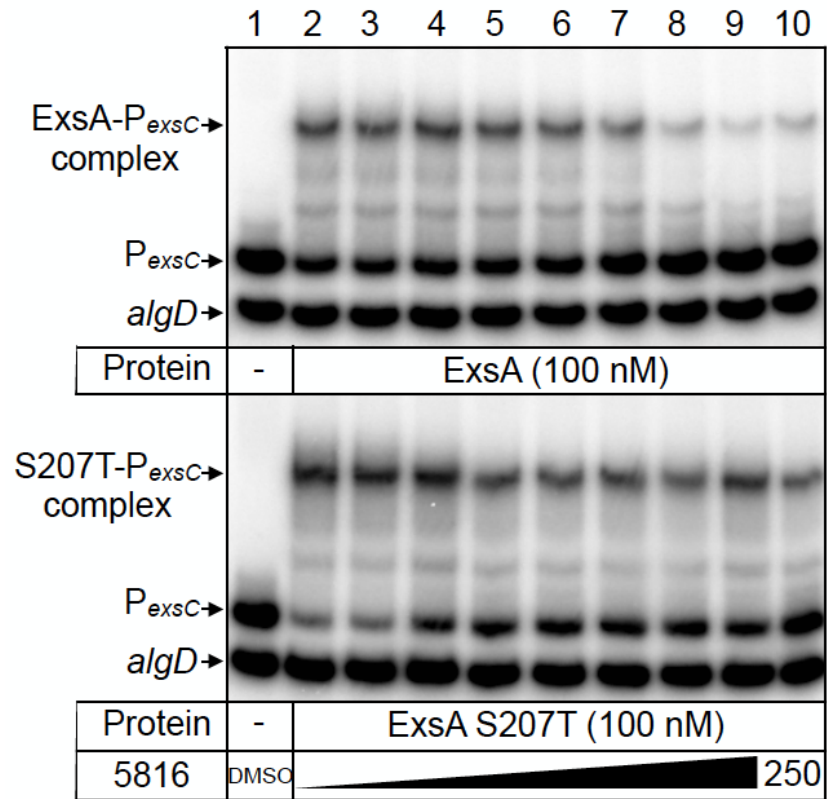

FIG S5. Amino acid substitution S207T in recognition helix 1 alters ExsA-DNA binding in the presence of *N*-hydroxybenzimidazole 5816. ExsA or ExsA<sub>S207T</sub> (100 nM) were incubated with the indicated concentrations of compound 5816 (0-250 nM) to determine the half maximal inhibitory concentration (IC<sub>50</sub>) for inhibition of ExsA- $P_{\text{exsC}}$  complex formation.

Figure S5

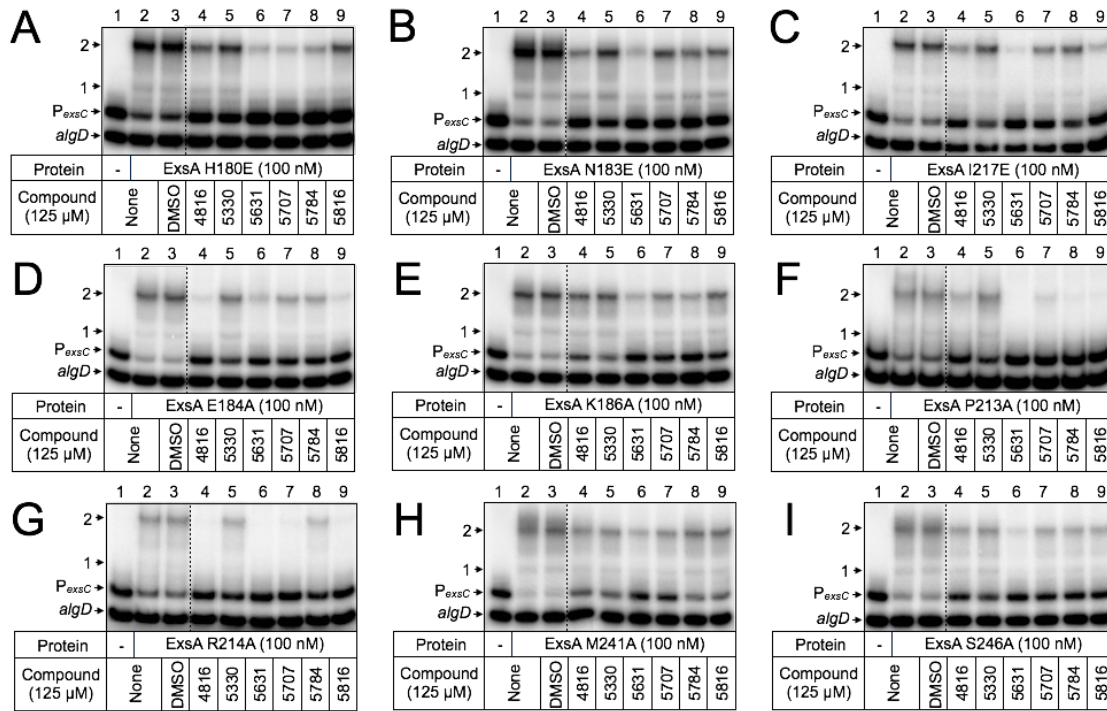

FIG S6. Glutamic acid and alanine substitutions in the putative inhibitor-binding pocket affect ExsA-DNA binding in the presence of *N*-hydroxybenzimidazoles. ExsA<sub>H180E</sub> (A), ExsA<sub>N183E</sub> (B), ExsA<sub>I217E</sub> (C), ExsA<sub>E184A</sub> (D), ExsA<sub>K186A</sub> (E), ExsA<sub>P213A</sub> (F), ExsA<sub>R214A</sub> (G), ExsA<sub>M241A</sub> (H), and ExsA<sub>S246A</sub> (I) (100 nM) were treated with DMSO (2.5%) or each *N*-hydroxybenzimidazole (125  $\mu\text{M}$ ) for 5 min before incubation with specific ( $P_{\text{exsC}}$ ) and nonspecific ( $\text{algD}$ ) radiolabeled probes (0.05 nM each) for 15 min at 25°C. Native polyacrylamide gel electrophoresis and phosphorimaging was performed to examine binding reactions. Protein-DNA complexes and unshifted specific and nonspecific probes are indicated.

Figure S6

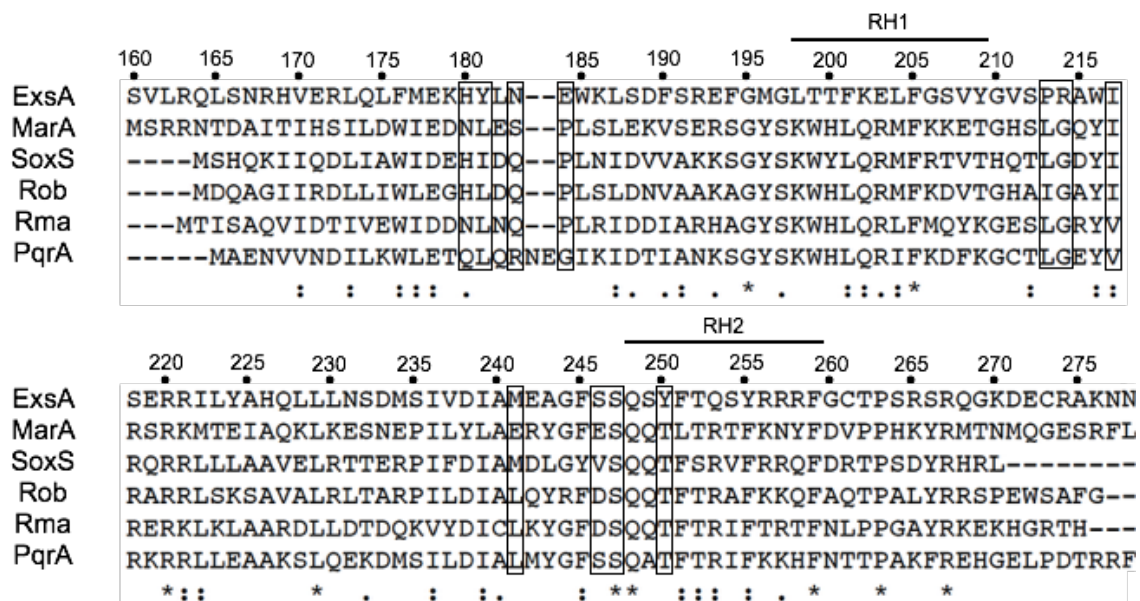

FIG S7. Amino acid alignment of AraC family protein DNA-binding domains. ExsA amino acids are numbered, and recognition helices (RH1 and RH2) are indicated with a bold line. Boxes outline amino acids that were mutagenized in ExsA.

Figure S7
